# Supplementary material for: Appbasierte Förderansätze für Kinder mit Lernstörungen
Source: Atypon-hosted journal article supplement (doi:10.1024/2235-0977/a000428), 2023-12-21
Supplement: 2235-0977_a000428_esm1.pdf [file 2235-0977_a000428_esm1.pdf]

## **Elektronische Supplemente (ESM)**

zur Publikation mit dem Titel

### **Appbasierte Förderansätze für Kinder mit Lernstörungen – Chancen und Herausforderungen aus der Angehörigenperspektive**

in der Zeitschrift *Lernen und Lernstörungen*

#### **Autor:innen**

**Christian Kißler, Teresa Sartor, Christin Vanauer, Ann-Katrin Schulz, Björn Witzel,  
Kristina Moll, Gerd Schulte-Körne & Jörg-Tobias Kuhn**

#### Inhalt dieses Dokumentes:

Dieses Dokument umfasst die Transkriptionen der Interviews mit den zwei Projektbegleiterinnen, die Familien während eines app-basierten und strukturierten Trainings begleiteten. An diesem Training nahmen Kinder mit einer kombinierten Lernstörung (Lesestörung/ Lese- und Rechtschreib-Störung sowie Rechenstörung liegen zeitgleich vor) oder einer isolierten Lernstörung (nur eine Lernstörung liegt vor) teil.

#### Erläuterungen zu den in den Transkriptionen verwendeten Kürzeln:

- A: Person, welche die Daten erhebt bzw. das Interview durchführt.
- I1: Die erste Projektbegleiterin, die interviewt wurde („Projektbegleiterin 1“).
- I2: Die zweite Projektbegleiterin, die interviewt wurde („Projektbegleiterin 2“).

Kontakt:  
Christian Kißler  
Technische Universität Dortmund  
Emil-Figge-Str. 50  
44227 Dortmund  
(+49) 231 7556544  
christian.kissler@tu-dortmund.de

- 1 A: **Genau, ja, okay, jetzt geht's los. (lacht) Gut, dann starten wir doch mal. Erzähl**  
2 **mir doch bitte einmal von deiner Arbeit für das Aufgabenpaket**  
3 **Trainingsmonitoring. ##00:13##**
- 4 I1: Genau, ähm, also es war so, nachdem die Kinder dann mit dem Training gestartet  
5 sind, ging es vor allen Dingen darum, dass man auch geschaut hat, ob die Kinder  
6 wirklich regelmäßig trainieren. Also sprich die vorgegebenen Spieleinheiten, die  
7 wöchentlich trainiert oder gespielt werden sollten, ähm galt es immer dann  
8 wöchentlich einmal in dem Monitoring zu überprüfen, die dann in eine Excel- Tabelle  
9 zu pflegen. Und um dort dann so eine Gesamtübersicht, ähm ich glaub, das waren  
10 insgesamt 14 Spielwochen. Dass man das dann auf einem Weg wirklich  
11 nachverfolgen konnte und, wenn man dann gesehen hat, dass zum Beispiel Kinder  
12 unregelmäßig trainieren ähm oder beziehungsweise abweichend von den Vorgaben  
13 jeweils für Namagi oder Talasia. Ähm dann war unsere Aufgabe, dass wir die Eltern  
14 z. B. telefonisch kontaktieren ähm oder auch per E-Mail und da dann mal erstmal  
15 ganz generell nachfragen, ob es möglicherweise irgendwelche Schwierigkeiten mit  
16 den Apps gab. Die konnten ja zum Beispiel auch technischer Art sein. ##01:14##
- 17 A: **Mmh (bejahend), wie groß war denn der zeitliche Aufwand für dich dabei?**  
18 **##01:20##**
- 19 I1: (..) Ähm, also, das Ablesen der gemachten Spieleinheiten auf der Plattform von  
20 Meister Cody und das Übertragen in die Excel Tabelle, das war natürlich jetzt ein  
21 eher geringer Zeitaufwand. Das war ja nur ein Übertragen von wenigen Kennwerten.  
22 Was SCHON zeitintensiver war, ja, war das Anrufen bei den Eltern, weil man die  
23 natürlich auch teilweise nicht direkt erreicht hat. Und was manchmal ziemlich  
24 herausfordernd war, ähm wir haben ja von unseren privaten Rufnummern  
25 angerufen, was natürlich jetzt positiv war vor dem Hintergrund, dass man das  
26 zuhause machen konnte, aus dem Home-Office heraus. Nachteil war dann aber, es  
27 passierte manchmal, dass Eltern einen dann irgendwann am Abend um 20 Uhr  
28 anriefen. Und ähm ich hab primär immer mit diesen Codes gearbeitet hab oder dann  
29 auch gar nicht mehr wusste, auf welches Kind sich das bezieht (lacht). Dann war  
30 man (..) ja dann hat das immer Zeit gekostet. Weil dann musste man entweder ganz,  
31 ganz schnell, wenn man den Rechner grad zur Hand hatte, nochmal die Daten  
32 raussuchen. Und wenn das eben nicht möglich war, weil man unterwegs war, hatte  
33 das zur Folge, dass man ja nochmal am nächsten Tag anrufen musste. Und ja  
34 summa summarum, würde ich mal sagen, dass das Eintragen der Kennwerte ja  
35 (seufzen) kann man 15 Minuten sagen, jetzt mal gerechnet für ungefähr 10 Kinder.

36 Und ähm wenn man jetzt aber man musste ja nicht immer bei allen 10 Kindern  
37 anrufen. Ich sag mal, man musste vielleicht 5 Eltern versuchen anrufen. (...)  
38 (seufzen), das kann schon mal hochgerechnet vielleicht so 45 Minuten gedauert  
39 haben, wenn man jetzt wirklich die ganze Zeit miteinrechnet. Aber das sind jetzt  
40 tatsächlich nur ähm (lacht) geschätzte Richtwerte, das liegt schon über ein Jahr  
41 zurück. Möglicherweise ist das jetzt auch mit den An- äh Angaben der anderen  
42 vielleicht gar nicht deckungsgleich. (lacht) ##03:14##

43 A: **(lacht) Das ist gar kein Problem. Genau, du hast ja aber den Zusammenhang**  
44 **schon auch bei der Zusammenarbeit mit den Familien angesprochen. Wie sah**  
45 **die denn darüber hinaus noch aus? ##03:26##**

46 I1: (..) Ähm, meinst du jetzt in Bezug auf die Telefonate, wie die inhaltlich abgelaufen  
47 sind? ##03:33##

48 A: **Genau, ja. ##03:34##**

49 I1: Genau, also ähm es war so, dass, wenn es der Fall war, dass wir die Eltern gar nicht  
50 erreichen konnten, dann haben wir das erstmal nochmal per E-Mail versucht. Und  
51 manche auch um Rückruf gebeten oder auf die Mailbox auch gesprochen mal. Und  
52 ansonsten äh lief es dann so ab, dass ich erstmal nachgefragt habe, ob es zum  
53 Beispiel ähm generelle Probleme mit der App gibt, technische Schwierigkeiten,  
54 Verständnisschwierigkeiten oder was Gründe sind vielleicht, ähm woran es liegt,  
55 dass die ähm, dass das Kind in der jeweiligen Woche eben so wenig trainiert hat  
56 oder gar nicht. Und dann stellte sich in der Regel heraus, dass vor allem Dingen  
57 eine große Herausforderung darin bestand, das Training neben Ganztagschule  
58 UND Hobbys da noch zu implementieren in einem Wochenplan der Kinder und  
59 insbesondere dann, wenn zum Beispiel auch Urlaubszeiten waren, dann schief das  
60 Training eigentlich ganz ein. Und das lag dann (..) vor allen Dingen auch daran, dass  
61 auch alle anderen Aktivitäten, die in den sonst üblichen Wochenplan der Kinder  
62 installiert waren, ja erstmal ausfielen für den Zeitrahmen. ##04:39##

63 A: **Mhm (bejahend), okay, genau, sind dir denn auch einige Familien in Bezug**  
64 **auf diese Nutzung der Trainingsapps ganz besonders in Erinnerung**  
65 **geblieben? Und warum? ##04:55##**

66 I1: Mmh (überlegend), ja, also besonders in Erinnerung geblieben sind dann natürlich  
67 die wenigen Kinder, bei denen man quasi höchstens einmal angerufen hat, um mal  
68 einmal nachzufragen ganz generell und dann das nie wieder erforderlich war, weil

69 die Kinder immer fleißig trainiert haben. Oder da nur wenige Lücken waren, sodass  
70 man gar nicht nachgefragt hat, das ist einem natürlich dann in Erinnerung geblieben.  
71 Und ähm auch in Erinnerung geblieben sind mir Familien, ich kann das jetzt gar  
72 nicht mehr genau sagen, wie viele es waren, die es eigentlich gar nicht geschafft  
73 haben, jemals das Training zu beginnen. (..) Ähm und auch Familien, die (..) ja große  
74 (..) sprachliche Barrieren hatten, das war, glaube ich, aber auch nur eine Familie.  
75 Und ansonsten ja war es so auch öfters mal so, dass Eltern schon sehr bemüht  
76 waren. Und auch versucht haben, das zu erklären und immer wieder die Kinder  
77 motivieren wollten, am Training dran zu bleiben, aber da auch auf Widerstand bei  
78 den Kindern gestoßen sind, weil die das Training oder das Spiel als langweilig  
79 empfunden haben. Und ähm ja, die Eltern dann die Kinder da auch nicht zu zwingen  
80 wollten – verständlicherweise. ##06:17##

81 A: **Okay, du hattest gerade von Familien berichtet, die gar nicht angefangen**  
82 **haben mit dem Training. Was hatten die denn für Gründe benannt, dass die**  
83 **dann nicht begonnen haben? ##06:28##**

84 I1: Ähm das war (..) oder beziehungsweise die haben dann vielleicht nur einmal trainiert  
85 ähm. Das war dann, dass zum Beispiel das Kind in einem Fall, wenn ich mich recht  
86 erinnere, war einfach überhaupt nicht zu motivieren und ähm da bestand einfach  
87 aus Sicht der Eltern da keine Chance, das Kind dazu zu bewegen. Und ein anderer  
88 Fall da war ähm es auch einfach schon in dem Wochenplan des Kindes mit den  
89 ganzen Dingen drumherum so voll, ähm dass die Eltern sich da auch etwas drin  
90 überfordert gesehen haben. Und ein anderer Fall, kann ich mich noch erinnern, war  
91 das Kind einfach lange Zeit immer krank und da war das einfach dann, ich meine,  
92 aufgrund stetig anhaltender Migräne einfach nicht möglich, dann noch zu trainieren.  
93 ##07:12##

94 A: **Mmh (bejahend) okay, genau, aus deinen Berichten geht ja gehen ja schon**  
95 **einige Möglichkeiten und Schwierigkeiten bei der Nutzung der Meister Cody**  
96 **Trainingsapps hervor. Und da würde ich gern ein bisschen genauer**  
97 **nachhaken und würde mit den positiven Aspekten der App starten. Welche**  
98 **Möglichkeit siehst oder welche MöglichkeitEN (lacht) siehst du denn bei der**  
99 **Nutzung der Apps genau? ##07:40##**

100 I1: Also ich glaube, dass die App natürlich vor allen Dingen ähm also zeitgenössisch  
101 ist. Es ist, also wir sind in einem ähm digitalem Zeitalter und es wird immer wichtiger  
102 und Kinder verbringen ja auch immer Zeit an Tablets oder generell in Apps. Ähm

103 und da sehe ich eine große Möglichkeit drin und ich glaube, das hat schon einen  
104 großen Benefit. Insbesondere dann, wenn man das zum Beispiel ins  
105 Schulgeschehen integriert. Weil im Vergleich jetzt ein Arbeitsblatt auszufüllen oder  
106 dann wirklich mit einem Tablet trainieren zu dürfen. Das ist schon glaube ich  
107 nochmal viel interessanter für Kinder. Und ich denke, dass sowas auch dass sowas  
108 dann gut im Bereich der Sozialarbeit einzubinden wäre. Also insbesondere an den  
109 Grundschulen gibt es ja extra dann nochmal Unterstützung von  
110 sozialpädagogischen Fachkräften, wo die Kinder dann auch hingehen können. Und  
111 ich glaube in SO einem Setting und in SO einem Kontext wäre das schon gut zu  
112 implementieren, weil dort gibt es ähm gibt es ja auch Förderung, die dort  
113 durchgeführt wird und das da nochmal miteinzubringen, ist, glaube ich, eine gute  
114 Möglichkeit. Ansonsten denke ich natürlich auch, dass es ähm aus Sicht der Eltern  
115 sehr niedrigschwellig ist, wenn die App dann erstmal angeschafft worden ist. Denn  
116 die sind ja weitestgehend dann erstmal nicht miteingebunden und ähm das Kind  
117 kann die App weitestgehend ja auch selbst bedienen, selbst ausführen und ähm  
118 man hat zusätzlich dann natürlich auch, wenn man das jetzt vergleicht mit einem  
119 anderen Förderungsbaustein vielleicht. Ähm da muss man dann nicht extra erst  
120 hinfahren, sondern das kann man zuhause an seinem eigenen Endgerät machen.  
121 ##09:19##

122 A: **Mhm (bejahend) genau, jetzt würde ich gerne noch auf die eher negativen**  
123 **Aspekte der App zu sprechen kommen. Da hast du ja auch schon ein bisschen**  
124 **was von erzählt. Genau, bitte erzähl mir doch mal mehr über die Grenzen, die**  
125 **du bei der Nutzung der Meister Cody Trainingsapps siehst? ##09:40##**

126 I1: Ich denke, die Grenzen sind auch damit einhergehend. Natürlich, dass die zwar, wie  
127 schon gesagt, der Vorteil ist, dass man das gut zuhause und alleine machen kann.  
128 Auf der anderen Seite ist dann natürlich der Nachteil, dass das in  
129 Anführungszeichen so ganz ohne festen Terminplan vonstattengeht (..) und da ist  
130 man dann natürlich immer selbst angehalten, als Eltern da immer feste Zeiten zu  
131 implementieren, was schon, glaube ich, sehr herausfordernd sein kann. Wenn man  
132 jetzt irgendwo extern eine Förderung hätte, jetzt im Bereich des Lesens oder  
133 Rechnens. Dann hätte man da feste Termine, die man wahrnehmen muss, ähm also  
134 da sagt ja man eher seltener ab, als wenn man jetzt einfach die Möglichkeit hat in  
135 Anführungsstrichen eine App nicht zu spielen. Und ich denke bei Kindern, die jetzt  
136 sehr stark beeinträchtigt sind im Lesen oder (Verbindung wird abgehackter und  
137 schwerer verständlich) im Rechnen, kann ich mir gut vorstellen, dass die App alleine

- 138 nicht ausreicht. Dass dann natürlich zusätzlich noch Förderelemente und ähm die  
139 Internetverbindung ist gerade instabil, kannst du mich noch hören (...). Okay, ähm.  
140 ##10:58##
- 141 A: **Jetzt geht's wieder. ##11:00##**
- 142 I1: Also ansonsten mit den Grenzen (..) ich denke, dass es auch (unverständlich,  
143 Internetverbindung gestört). ##11:05## Kannst du mich wieder hören, oder?  
144 ##11:09##
- 145 A: **Ja, jetzt kann ich dich wieder hören. Genau, von dem, was du eben erzählt  
146 hast, ist ein bisschen was untergegangen. Genau. Vielleicht könntest du das  
147 nochmal wiederholen (lacht). ##11:19##**
- 148 I1: Ähm, was genau? Also ab wann ist es untergegangen? ##11:23##
- 149 A: **(..) Gute Frage (lacht), das ist jetzt dieser Moment, wo man jetzt selber das  
150 Gespräch nochmal rückverfolgen muss. (..) ##11:37##**
- 151 I1: Ähm, also ich versuche es einfach nochmal, es selbst zu paraphrasieren. Also, ich  
152 denke, die Möglichkeiten, die man hat, wenn man zuhause das Training selber  
153 selbstständig durchführen kann, also am eigenen Endgerät, sind zwar Vorteile. Aber  
154 auch gleichzeitig mit dem Nachteil verbunden, dass man auf sich allein gestellt ist.  
155 Die Eltern haben die alleinige Verantwortung, dass das Training wirklich fest in dem  
156 Alltag des Kindes dann eingebunden ist. Wenn man jetzt zusätzlich aber  
157 möglicherweise oder generell irgendwo anders noch eine Förderung hätte, da würde  
158 man ja viel seltener Termine absagen. Da ist ja die Hemmschwelle viel größer als  
159 einfach zu sagen: „Naja komm heute spiele ich die App nicht. Der Tag war so  
160 anstrengend.“ Und ich denke natürlich, dass Kinder, die stark beeinträchtigt sind im  
161 Lesen oder Rechnen, nicht allein auf die App zurückgreifen können. Also dass das  
162 da schon noch andere Bausteine, Therapie oder Förderungselemente implementiert  
163 werden müssten. Und ähm ich kann mir da auch gut vorstellen, dass Eltern  
164 möglicherweise aufgrund einer sprachlichen Barriere damit überfordert sind. Da  
165 wäre es vielleicht noch ganz gut, wenn das in verschiedenen Sprachen, zumindest  
166 der Text drumherum, die den Eltern dann die App erklären, nochmal in anderen  
167 Sprachen verfasst sind. Oder vielleicht noch irgendwelche Erklärvideos oder  
168 nochmal Hilfen, dass man das wirklich fest installiert in Wochenpläne. Aber genau,  
169 jetzt schweife ich schon wieder von den Grenzen der App ab. Ähm ja genau, ja  
170 ansonsten (..) fallen mir jetzt ad hoc erstmal keine Grenzen, glaube ich, ein.  
171 ##13:09##

- 172 A: **Hast du denn auch Probleme mitbekommen? Oh! ##13:17##**
- 173 I1: Ähm, ne, genau, eine Grenze würde ich noch ergänzen, ähm was auch was auch  
174 mit dem Problemaspekt schon einhergeht. Kinder sagten ja, dass das langweilig  
175 wäre mit der App zu spielen. Das ist natürlich ein großer Nachteil bei dieser App,  
176 weil, wenn ich mir jetzt vorstelle, man hat ein Kind vor sich sitzen, mit dem man eine  
177 Förderung durchführt. Dann kann ich natürlich darauf reagieren und interagieren  
178 und wenn dann bestimmte Dinge gerade für das Kind super langweilig sind, dann  
179 kann ich einfach in meinem Baukasten vielleicht erstmal ein anderes Element  
180 auswählen, dass die Motivation auch nicht verloren geht und das Kind am Ball bleibt.  
181 Und (.) dieses also diesen Aspekt kann die App ja einfach nicht leisten. Also das  
182 stoppt dann quasi, wenn man dann diese Einheit des Trainings nicht fortführt, dann  
183 gelangt man immer wieder an den gleichen Punkt und, ich glaube, dann passiert es,  
184 dass Kinder irgendwann sagen: „Ne, jetzt ist es doof, jetzt spiele ich nicht weiter!“  
185 ##14:10##
- 186 A: **Mhm (bejahend), okay, genau. Gab es denn auch Probleme oder  
187 Schwierigkeiten, von denen die Eltern berichtet haben oder die du ganz  
188 konkret mitbekommen hast? Zum Beispiel sowas wie technische Probleme.  
189 ##14:22##**
- 190 I1: Ähm also, ähm eine Verständnisschwierigkeit ist mir häufig aufgefallen und zwar ist  
191 es ja so, es wurde dann so zum Beispiel an also instruiert, die Kinder sollen dreimal  
192 die Woche spielen und dieses Dreimal-Die-Woche-Spielen bestand aber aus  
193 Trainingseinheiten nochmal. Also ich meine, bei Talasia war es so, man sollte  
194 dreimal die Woche drei Einheiten spielen, also insgesamt 9 verschiedene Einheiten.  
195 Und das haben viele nicht ganz verstanden, also die dachten dann, dass drei  
196 einzelne Einheiten dann schon dieses umfassende Training gewesen wären. Ja,  
197 das ist mir häufiger aufgefallen. ##15:09##
- 198 A: **(..) Gut, dann würde ich auch mit dir einmal gerne über digitales Lernen im  
199 Allgemeinen sprechen, also über die Meister Cody Trainingsapps hinaus. Und  
200 dazu würde ich zuerst gerne von dir wissen, was du unter digitalem Lernen  
201 verstehst. Was für dich dazu gehört? ##15:33##**
- 202 I1: Also ich persönlich verstehe, ich denke, dieser Begriff kann natürlich unterschiedlich  
203 weit gefasst werden. Ähm ich persönlich verstehe unter dem Begriff digitalem  
204 Lernen, dass natürlich nicht die Präsenzzeiten in der Schule dadurch komplett  
205 ausfallen können. Sondern dass das Lernen im Klassenverband über die normale

- 206 Interaktion zwischen Schüler:innen und Lehrer:innen nochmal ähm ja unterstützt  
207 wird durch digitale Möglichkeiten, also durch Apps, Computer. ##16:06##
- 208 A: **(..) Mhm (bejahend). Welche Vor- und Nachteile siehst du denn bei der**  
209 **Nutzung digitaler Lernmöglichkeiten? ##16:16##**
- 210 I1: (..) Ähmmm, ja, als Vorteil sehe ich ganz klar, dass das zeitgenössisch ist und, wie  
211 ich es auch schon angerissen hab, dass man das gut selber ähm auch von zuhause  
212 aus (.) durchführen kann oder dass man Zugang dazu hat. Und ich denke auch,  
213 dass insbesondere Apps, die vielleicht sogar kostenfrei sind, noch eine viel größere  
214 Reichweite haben und von viel mehr Kindern genutzt werden können als zum  
215 Beispiel andere Möglichkeiten aus dem Bereich des Lernens, also sprich durch alle  
216 Gesellschaftsschichten hinweg. Ein Tablet hat jetzt vielleicht nicht jeder, aber die  
217 meisten haben zuhause zumindest ein Smartphone. Und ja, wer da Zugang zum  
218 Internet hat, dem sind natürlich in dem Sinne schon Möglichkeiten viel mehr eröffnet,  
219 als wenn man jetzt zum Beispiel nur auf Ressourcen, die an Personen gebunden  
220 sind, zurückgreifen kann. ##17:14##
- 221 A: **(...) Wurden dir denn auch von Seiten der Eltern Meinungen zum digitalen**  
222 **Lernen zugetragen? Und welche Meinungen hatten denn da die Eltern so?**  
223 **##17:25##**
- 224 I1: Ähm, die Eltern waren in der Regel zunächst einmal positiv gestimmt, dass es eine  
225 App ist, mit der verbundenen Hoffnung, dass die Kinder eine App viel besser  
226 annehmen und viel mehr Interesse und Lust darauf haben, als wenn sie jetzt zum  
227 Beispiel klassischerweise irgendwelche Übungszettel ausfüllen müssten.  
228 ##17:47##
- 229 A: **Mmh (bejahend), okay, dann sind wir tatsächlich auch schon ziemlich am**  
230 **Ende angelangt. Gibt es denn noch etwas, was du gerne noch ansprechen**  
231 **würdest, was ich nicht erfragt habe? ##18:02##**
- 232 I1: (..) Ähm, ich denke eigentlich nicht. ##18:08##
- 233 A: **Okay, gut. Dann bedanke ich mich für das Gespräch. Stoppe die- ##18:14##**



- 1 A: **(unv. 00:01) schön ist - das hast du erklärt. Okay. Ja, dann starten wir doch**  
2 **direkt. Erzähl mir doch bitte einmal von deiner Arbeit für die (.) das**  
3 **Aufgabenpaket Trainingsmonitoring. ##00:15##**
- 4 I2: Okay, also ähm, beim Trainingsmonitoring geht's halt darum ähm die  
5 Trainingseinheiten von den Kindern zu überwachen, die halt bei uns in dem Training  
6 sind. Und das mache ich über eine Seite ähm, wie genau die heißt, ist ja auch  
7 erstmal unwichtig, aber es gibt dafür eine Seite (.) praktisch das Backend, wo ähm  
8 wir praktisch einsehen können, ähm welche Aufgaben die Kinder gemacht haben:  
9 Wie viele Aufgaben die Kinder pro Tag gemacht haben und an welchen Tagen in  
10 der Woche ähm trainiert wurde. Ähm genau, das ist dann jeweils zugeordnet zu den  
11 jeweiligen Kindern mit ihrem Code. Und ähm in eine Exceltabelle schreibe ich dann  
12 immer auf, ähm wieviel trainiert wurde ähm innerhalb einer Woche und ich fange  
13 immer. Ich mach montags immer diese Kontrollen ähm für die letzte Woche, die  
14 anstand. Genau, dann guck ich halt immer, wie viel trainiert wurde, ob das dann halt  
15 mit den Vorgaben übereinstimmt. Weil Talasia trainiert anders als Namagi. Und ähm  
16 trag das dann eben entsprechend in die Tabelle ein und sollten dann halt Sachen  
17 auffallen, wie zum Beispiel, dass nur einmal in der Woche trainiert wurde oder dass  
18 es jetzt schon die zweite Woche ist, in der wenig oder gar nicht trainiert wurde, ähm  
19 dann ist es immer noch die meine Aufgabe ähm, dann mich mit den Eltern in  
20 Verbindung zu setzen und mal zu hören, was dann da das Problem: Also ob es an  
21 einem technischen Problem liegt oder ob die die letzten zwei Wochen im Urlaub  
22 waren oder ob es irgendwelche Probleme mit dem Tablet gibt oder oder oder. Damit  
23 wir halt einfach ähm wissen, warum jetzt halt länger nicht trainiert wurde ähm. Und  
24 die eventuell halt, weil es auch öfter mal vorkommt, dass es halt vergessen (leichtes  
25 Lachen) wird, einfach, einfach nochmal dran zu erinnern: „Hey da ist das Training  
26 noch, ne? Könnt ihr gucken, dass ihr wieder anfangt zu trainieren?“ Genau.  
27 ##02:10##
- 28 A: **Mhm (bejahend), okay, du hast schon über die Familien gesprochen. Darauf**  
29 **würde ich gern direkt weiter eingehen. Wie sah denn deine Zusammenarbeit**  
30 **mit den Familien aus? ##02:24##**
- 31 I2: Ähm Joa, ähm das kommt halt immer ganz drauf an, wie gut die Eltern halt selbst  
32 mit Technik ähm klarkommen. Meistens ähm hatte ich (.) oder mit den meisten  
33 Familien hatte ich zumindestens einmal Kontakt, ähm um Bescheid zu geben: „Hey  
34 die E-Mail ist da mit dem Code ähm, den ihr braucht, um die App praktisch  
35 freizuschalten.“ Dass sie das ähm umsonst machen können, weil normalerweise

36 muss man ja für die App bezahlen. Ähm genau, habe ich die meisten Familien immer  
37 angerufen und gesagt: „Hey, der Code ist da. Ihr könnt mit dem Training anfangen.  
38 In der E-Mail kriegt ihr ähm eine PDF Datei, da steht ganz detailliert beschrieben,  
39 wie ihr das runterladen könnt. Falls ihr trotzdem irgendwelche Probleme habt, das  
40 ist meine Handy-Nummer. Da könnt ihr mich erreichen.“ So, also meistens ist das  
41 so der Einklang, ähm den ich mit fast allen Familien hatte. Ähm außer es haben halt  
42 Familien direkt von sich aus gemerkt: „Äh okay, die E-Mail ist da.“ Und haben das  
43 von alleine gemacht, aber bei den meisten habe ich angerufen ähm, um das halt so  
44 ein bisschen ins Rollen zu bringen ähm. Und dann kommt es halt immer ganz drauf  
45 an, wie ähm pflichtbewusst trainiert wird. Ähm ich hatte durchaus mit einigen  
46 Familien gar keinen Kontakt, weil die halt sehr stringent selbst trainiert haben. Ähm  
47 und halt auch direkt mit der E-Mail ähm das eigenständig runtergeladen haben,  
48 eingerichtet haben und das Kind hat halt stringent auch immer trainiert, sodass ich  
49 da halt nie mit den Familien Kontakt hatte, weil die das halt von sich aus äh von sich  
50 aus in Perfektion durchgearbeitet haben, so wie es vorgesehen war. Ähm dann gibt  
51 es natürlich Familien, bei denen ruft man an und sagt denen: „Hey, der Code ist da.“  
52 Und ähm dann funktioniert es erst ein paar Wochen und dann ruft man da nochmal  
53 an, weil man merkt hmmm (Seltsamkeit ausdrückend, negativ): Irgendwie wird es  
54 jetzt weniger oder es ist die letzten Wochen gar nicht trainiert worden. Und ähm  
55 (seufzt) dann gibt es natürlich eine Vielzahl an Gründen, woran das liegen kann, ne?  
56 Das Kind ist nicht motiviert, was dann natürlich nicht nur daran liegen kann, dass  
57 das Kind einfach keine Lust hat, sondern ähm dadurch, dass die Kinder ja auch alle  
58 Probleme in verschiedenen Bereichen haben, ähm dass das halt einfach für die  
59 anstrengend ist. Und ähm teilweise haben wir auch Kinder dazwischen (.) ein Kind  
60 habe ich jetzt noch im Kopf ähm, das hatte noch, ich glaube, ADHS oder sowas in  
61 die Richtung. Und der konnte sich da halt überhaupt nicht drauf konzentrieren und  
62 das ist ähm war halt für die Mutter super schwer, ihn dazu noch zu motivieren, das  
63 zu machen. Der hatte da am Anfang super viel Spaß dran und ähm das wurde dann  
64 halt immer weniger, bis dann dahin, dass jedes Mal, wenn die Mutter ihn darauf  
65 angesprochen hat: „Hey, du musst noch dieses Training machen.“ Dass er halt mehr  
66 oder weniger einen kleinen Wutanfall gekriegt hat und gesagt hat (Stimme leicht  
67 verstellt): „Ne, ich will das nicht mehr, ich mache das nicht mehr, das ist doof!“ Ähm  
68 dann hatten wir auch Kinder dazwischen, ähm die grundsätzlich das Training immer  
69 gemacht haben, aber die das halt so stark genervt hat, dass es (.) das sind ja immer  
70 wieder kommende Aufgaben, die erledigt werden müssen, und es wird jedes Mal  
71 wieder erklärt, was gemacht werden muss. Dass Kinder das so auf die Palme

72 gebracht hat, dass sie jedes Mal nochmal erklärt bekommen haben, was sie in  
73 dieser Aufgabe machen müssen, obwohl sie das jetzt schon, ich weiß nicht wie oft,  
74 gehört haben, dass sie einfach den Kaffee offen hatten, mehr oder weniger  
75 umgangssprachlich gesagt. Ähm und dann halt einfach keine Lust mehr hatten das  
76 weiterzumachen, weil sie weil ihnen das so auf den Keks ging. Das sind dann zum  
77 Beispiel auch so Sachen, die ich dann ähm an [geschwärzt] oder [geschwärzt] halt  
78 weitergegeben habe, weil sowas halt Sachen sind, die man eventuell bedenken  
79 kann, wenn die App halt weiter in Benutzung bleibt. Dass sowas halt auch Reaktanz  
80 auslöst und dass das halt ein Grund sein, warum Kinder aufhören damit zu  
81 trainieren. Ähm, genau, also das sind jetzt so Sachen, wo halt aktiv Reaktanz  
82 (lachend) auf die App mehr oder weniger ähm entstanden ist. Dann gibt es natürlich  
83 Familien, die halt einfach viel zu tun hatten. Jetzt auch mit Corona war das natürlich  
84 auch, dass viel (.) ähm Schule halt auch mehr oder weniger zuhause gemacht  
85 wurde. Und dadurch, dass es halt Grundschul Kinder sind, müssen sich die Eltern ja  
86 noch ein bisschen mehr drum kümmern, als wenn es jetzt Kinder aus der  
87 weiterführenden ähm Schule sind, die halt eigenständig schon lernen können. Und  
88 ähm genau. Oder wenn dann viele Kinder halt zuhause sind und die sich halt so  
89 zusammengetan hat und mehr oder weniger aus der Nachbarschaft dann noch  
90 Kinder da sind und die Eltern halt viel zu tun haben, ist das dann halt manchmal  
91 untergegangen. Ähm dann hatten wir auch eine Familie, ähm die gläubig waren, (.) wo  
92 ähm dann in der Zeit Ramadan war. Und die Tochter eigentlich nicht mit sich da an  
93 die Ramadan-Regeln halten muss, aber dadurch, dass sie halt damit aufwächst und  
94 alle das machen, sie natürlich auch das genauso - ne? – mitmachen möchte. Für so  
95 ein Kind ist das ja natürlich weitaus anstrengender körperlich ähm in dieser Weise  
96 zu fasten als für jemanden, der erwachsen ist. Ähm und dementsprechend hat der  
97 Vater dann gesagt: „Ja, er erinnert seine Tochter da nochmal dran, ähm aber die ist  
98 halt ECHT PLATT OFT“. Und ähm genau. Und dann haben wir halt ähm auch Fälle  
99 dazwischen, wo das Internet da nicht funktioniert hat. Oder es ähm Tabletprobleme  
100 gibt und wir halt (.) UNS gesagt wird: „Ja, es wird trainiert.“ Aber wir hier nichts  
101 praktisch an Rückmeldungen kriegen in unserem Ende. Ähm das sind halt immer so  
102 Fälle, wo ich halt immer so ein bisschen vorsichtig bin, weil ähm die können dann  
103 viel erzählen und da kann dann schlussendlich doch nicht viel hinterstecken. Ähm  
104 genau, ähm das sind dann halt so die Fälle, wo ich immer so ein bisschen  
105 zurückhaltender bin. Ähm weil (.) da rufe ich auch oftmals die Woche an, bis die  
106 Eltern dann irgendwann den Kaffee offen haben (lachend) und nicht mehr äh und  
107 nicht mehr ähm die die Telefonate nicht mehr annehmen. Weil ähm in irgendeiner

108 Form muss ich das ja dann nachhalten. Ähm ja genau, das sind jetzt so aus dem  
109 Kopf, glaube ich, die größten Punkte so. ##08:41##

110 A: **Mmh-m (zustimmend) (.), gibt es (.) gibt es denn da auch eine Familie, die dir**  
111 **ganz besonders in Erinnerung geblieben ist hinsichtlich dieser Nutzung der**  
112 **Trainingsapps? Und warum? ##08:51##**

113 I2: Genau (.) ahm (.) ja, wie gesagt, also ich habe ja schon einige prägnante Beispiele  
114 gesagt, aber eine Familie ähm praktisch zwei Familien: Eine eher im positiven Sinne  
115 und eine eher negativer ist. Ähm eine Familie, die haben (.), ich glaube es war Ende  
116 Januar, den Code gekriegt (.) ähm für die Appnutzung. Und ähm ich weiß nicht, wie  
117 oft ich da angerufen habe (lachend). Ich habe immer wieder mit der Mutter  
118 gesprochen und die Mutter war jedes Mal so: „Ja, wir machen das, wir machen das.  
119 Ich hab viel zu tun, es ist Corona.“ Aber dies und das (.) aber dann zwischenzeitlich  
120 war irgendwer noch im Krankenhaus. Und dann waren sie krank und keine Ahnung.  
121 Und dann (seufzt) waren irgendwann Sommerferien und sie sagte: „Ja, sie macht  
122 das. Jetzt, es sind ja jetzt Sommerferien.“ Und dann ähm waren die Sommerferien  
123 vorbei und sie hat das immer noch nicht gemacht gefühlt. Ich weiß gar nicht, wann  
124 das schlussendlich sein Ende nahm. Aber irgendwann (lachend) haben wir dann  
125 das Training abgebrochen, das ist die Familie, über die du mich auch schon gefragt  
126 hast. Weil die Mutter halt einfach überfordert war, ähm die hatte halt Kinder zuhause,  
127 ich glaube drei oder so. Ähm und sie war halt mit dieser ganzen Corona-Sache, wo  
128 sie dann halt ihre Kinder dann auch noch mehr oder weniger beschulen musste, halt  
129 irgendwie überfordert, dass sie dann auch noch das Training gleichzeitig dabei  
130 machen musste. Und Dann haben wir halt dann gesagt so: „Okay, reicht. Ist jetzt,  
131 ist jetzt vorbei.“ Ähm dann oh ich habe noch eine Familie, okay. Dann auch eher  
132 negativ: Eine Familie, mit der habe ich auch oft gesprochen, äh weil ähm am Anfang  
133 war das immer so: (.) Punktuell wurde mal trainiert, sodass ich es gesehen habe  
134 und dann war irgendwann gar nichts mehr ähm bei mir auf der äh Seite, das ich  
135 sehen konnte. Und dann habe ich da angerufen und es hieß: Äh ja WLAN und das  
136 Tablet irgendwie Probleme, blablabla. Wir gucken, dass wir uns darum kümmern  
137 und es würde es würde aber trainiert. Die Tochter würde gerne trainieren. Es würde  
138 auch trainiert. Ja, tja und dann habe ich die nächste Woche wieder angerufen: „Ja,  
139 WLAN, Tablet mmh (zweifelnd), aber sie trainiert aber und so ging es dann weiter  
140 weiter weiter. (.) Ähm immer mit (.) halt ich hier auf meiner Software nichts gesehen,  
141 nichts gesehen, nichts gesehen. Ich immer wieder angerufen, angerufen, angerufen.  
142 Ähm teilweise habe ich die dann auch nicht erreicht. Dann haben sie mich sogar

143 zurückgerufen, was ich dann - ne? - erstmal positiv gesehen habe. Und irgendwann  
144 hatten sie glaube ich die Schnauze voll. Ähm und dann für die letzten zwei Monate,  
145 würde ich jetzt behaupten, ne wahrscheinlich nicht, aber doch schon für eine ganze  
146 Zeit lang ähm kriege ich sie jetzt jedenfalls nicht mehr erreicht. Das Kind hatte jetzt  
147 auch mittlerweile seine Posttestung, ohne dass wir die Eltern jemals erreicht haben,  
148 weil das in der Schule stattfand. Ähm ja, das ist halt auch so ein Fall von: Wurde  
149 jetzt trainiert? Wurde tatsächlich nicht trainiert? Hmm-Hmmm-hmm (abwägend). Äh,  
150 ist halt schwierig, ne? In so einem Fall kannst du halt tatsächlich nichts nachhalten.  
151 Es sei denn, du sagst den Eltern jetzt so: „Ich möchte, dass sie jedes Mal, wenn ihre  
152 Tochter trainiert (lachend), ein Foto machen.“ Und selbst das kann man ja faken,  
153 dann macht man die App einmal auf und fertig. Ähm ein positives Beispiel ist eine  
154 Familie, mit der ich auch sehr viel gesprochen habe. Ähm aber einfach weil da sich  
155 die Probleme häuften, die aber total engagiert waren. Ähm es fing damit an, dass,  
156 als sie angefangen haben zu trainieren, hatten sie Probleme damit überhaupt ins  
157 Training reinzukommen. Weil ähm die hatten eine T-Online E-Mail-Adresse und ähm  
158 T-Online (.) diese T-Online E-Mail-Adressen funktionieren nicht mit der App. Da gibt  
159 es dann hintenrum im Code irgendwelche Probleme. Die kriegten die Bestätigungs-  
160 E-Mail immer nicht, die sie brauchten, um das Training praktisch freizuschalten.  
161 Ähm und dann habe ich halt öfter mit dem Vater gesprochen, bis wir dann  
162 irgendwann rausgefunden haben: Okay, sprechen Sie mal mit den ähm Entwicklern,  
163 vielleicht haben die eine Idee, woran das liegen könnte. Das Problem war dann  
164 einfach beseitigt, ähm. Genau, dann konnten sie endlich ins Training gehen. Dann  
165 hatten wir noch irgendwelche anderen Probleme, weil ICH dann nicht sehen konnte,  
166 dass die tatsächlich trainiert haben. Was dann halt auch irgendwas hinten auf der  
167 Entwicklerseite ist da irgendwas schiefgelaufen. Das haben wir dann auch irgendwie  
168 geregelt gekriegt. Und ähm (.) die haben jedenfalls immer schön trainiert und die  
169 Tochter ist wohl auch sehr ähm enthusiastisch und macht das Training total gerne  
170 ähm, sodass ich mehr oder weniger, während trainiert wurde, nicht viel mit denen  
171 geredet hab. Ähm aber ähm jetzt gegen Posttestung und sowas halt wieder viel mit  
172 denen telefoniert wurde. Also ich weiß jetzt, wer diese Familie ist, wie der Vater ist,  
173 wie die Tochter heißt, wie die Freundin heißt. Ich weiß jetzt die Namen dieser  
174 kompletten Familie. Ich werde nie nicht wissen, dass dieser Code zu diesem Kind  
175 und dieser Familie gehört, weil ich halt so viel mit denen telefoniert habe. Aber die  
176 haben sind halt eigentlich so engagiert, dass ähm die halt immer auch von sich aus  
177 bei mir angerufen haben und gesagt haben: „Hey, wir haben hier das Problem. Hey,  
178 gibt's dafür eine Lösung?“. Ähm ich habe einmal aus Versehen bei denen

179 angerufen, weil ich wen anders anrufen wollte. Ich wollte den Vater noch anrufen  
180 am nächsten Tag zu einer vernünftigeren Uhrzeit und es war irgendwie halb elf oder  
181 sowas. Und der Vater ist dran gegangen und war so: „Hallo, was brauchen Sie  
182 denn? Was ist denn?“ Und ich so (weinerlich?): „Ich wollte Sie gar nicht anrufen,  
183 aber jetzt haben Sie mich zurückgerufen.“ Also dachte ich so, gehe ich mal dran.  
184 Und der Vater liegt auch zurzeit im Krankenhaus und ist trotzdem immer dabei  
185 gewesen und war so: „Ja und Termin und dies und das. Und meine Tochter und die  
186 macht das so gerne. Und ja, wir machen das mit der Studie trotzdem.“ Obwohl der  
187 halt im Krankenhaus liegt und äh operiert wird. Und keine Ahnung äh ist. Diese  
188 Familie war halt so engagiert, dass die halt sagen: „Nein, wir machen das weiter.  
189 Wir ziehen das durch.“ Und das ist halt so ein super positives Beispiel, obwohl da  
190 halt so viele Probleme sind. Dass die halt die ganze Zeit bei der Stange geblieben  
191 sind. ##15:24##

192 A: **Mmmh—mmh (bejahend). Ja, okay. Aus deinen Erfahrungsberichten geht ja**  
193 **schon hervor, dass es bei den Apps hier und da ein paar Möglichkeiten gibt,**  
194 **also was die Apps ermöglichen, was positiv machen, aber auch viele**  
195 **Schwierigkeiten. Und da würde ich jetzt gern genauer eingehen. Da du jetzt**  
196 **gerade schon bei ein paar Schwierigkeiten warst, würde ich da auch direkt**  
197 **anknüpfen. Bitte erzähl mir doch mehr über die Grenzen der Meister Cody**  
198 **Trainingsapps. Also wo siehst du da die Grenzen? ##15:57##**

199 I2: Mmmhmmh (überlegend) ähm. Grundsätzlich ist halt (.) ist trainieren mit Meis- ist  
200 meiner Meinung nach viel eigenverantwortliches Lernen. Das heißt, jemand, der  
201 davor sitzt, muss (.) trainieren wollen. Ähm wenn er das vernünftig macht. Natürlich  
202 haben wir jetzt noch so diese ähm Kontrollschleifen mit den Eltern. Dadurch, dass  
203 es sich hier ähm um noch kleinere Kinder sind, ähm die dann halt sagen: „Okay, du  
204 musst jetzt trainieren.“ Aber auch dieses, du musst jetzt trainieren, heißt ja nicht,  
205 dass vernünftig trainiert wird. Ich glaube, ich habe das jetzt noch nicht gesehen,  
206 dass es katastrophal war. Aber selbst, wenn du das Kind vor so eine App setzt und  
207 das Kind aber keinen Bock hat, kann das eigentlich einfach at random irgendwas  
208 eintippen und drauftippen und sonst irgendwas. Und das wird uns angezeigt als: „Ja,  
209 es wurde gemacht. Es wurde trainiert.“ Aber ähm die Qualität des Trainings wird  
210 damit halt nicht erhoben. Und eigentlich, wenn man sowas hat und halt wirklich  
211 gucken will: Okay ähm haben wir ähm wird wirklich trainiert? Und wird wirklich  
212 vernünftig trainiert? Müsste man meiner Meinung nach eigentlich auch Trainieren  
213 ähm erheben, wie war die Qualität des Trainings. Sieht man ähm, was weiß ich,

214 dass erst vernünftig trainiert wurde und die Kinder halt wirklich versucht haben, die  
215 Aufgaben zu lösen. Und plötzlich ist es at random ähm nur noch so bei 50 Prozent  
216 plötzlich, obwohl vorher die Aufgaben zu 80 Prozent richtig gelöst wurden. Einfach  
217 weil nur noch wild auf dem Tablet drauf rumgetippt wird. Ähm das ist halt so eine  
218 Sache, ähm, wie ich finde, wo halt auch so Trainingsapps vor allem, wenn es halt  
219 ähm forced exposure sozusagen ist für die Kinder, dass die gezwungen werden sich  
220 also diesem Training auszusetzen, ähm halt seine Grenzen hat, weil, selbst wenn  
221 man sie davor setzt, ist nicht garantiert, dass es halt wirklich gemacht wird. Ähm ja,  
222 genau, mmhm (überlegend), ansonsten ähm ist es natürlich halt auch sehr bedingt  
223 davon, ne? Ähm was für Technik dadrunter liegt. Also ähm eine App zu haben, ist  
224 schön und gut, aber wenn man jetzt ein altes klappriges Tablet hat, das halt  
225 mehrmals in so einer Trainingssession irgendwie abstürzt. Ähm dann ist es ja auch  
226 kein vergleichbares Training mehr, was die Kinder machen, sondern das ist ja dann  
227 (.) ja, wir machen das, weil wir es müssen. Und deswegen machen wir es halt dann  
228 irgendwie vernünftig, aber wenn das Tablet halt zweimal in dieser Session abstürzt  
229 oder selbst wenn es nur einmal abstürzt oder die App plötzlich sich schließt oder  
230 sonst irgendwas. Ähm ist das ja schon nicht mehr Training, so wie es eigentlich sein  
231 sollte. Ähm ja, das sind halt so Faktoren, die man halt immer bedenken muss, ne?  
232 Technik ist nicht unfehlbar. Ähm und das ist ja jetzt das Medium, auf das wir uns  
233 verlassen. Ähm von daher sollte man das halt immer so ein bisschen bedenken,  
234 dass ähm Technik einem auch einen Strich durch die Rechnung macht, ne? Wenn  
235 man dem Kind einen Zettel hinlegt und einen Stift hinlegt und sagt: „So, jetzt machst  
236 du diese Matheaufgaben.“ Dann weiß man: Das Kind, hat diesen Stift und diesen  
237 Zettel und macht die Matheaufgaben und bei der Technik ist es halt so, ne?  
238 (seufzen) Wir geben dem Kind das Tablet mit der App. Die Probleme können  
239 innerhalb des Tablets selbst liegen, dass es Probleme gibt, das kann am Internet  
240 liegen. Das Kind kann sagen: „Ich hab keinen Bock auf die App.“ Und blöd drauf rum  
241 tippen. Das Kind kann sagen: „Ich hab keinen Bock auf die App.“ Und schließt die  
242 App und macht für die 20 Minuten, die es trainieren sollte, googelt es irgendeinen  
243 bekloppten MIST auf Deutsch gesagt, ne? Das sind alles Sachen, die wir mehr oder  
244 weniger nicht ähm kontrollieren können. Selbst wenn die Eltern sagen: „Das Kind  
245 trainiert.“ Heißt es nicht, dass das Kind trainiert. Ähm ja. ##19:51##

246 A: **Mhm (bejahend) siehste denn auch bei der bei der Umsetzung von Namagi**  
247 **und Talasia direkt Schwierigkeiten? Also was tatsächlich bei diesen Apps für**  
248 **Probleme so sind? ##20:04##**

249 I2: Äh ja was halt (.), was ich ja schon angesprochen hab, was halt problematisch ist,  
250 ist halt dieses mit dem, dass man die Erklärung nicht überspringen kann. Und  
251 [geschwärtzt] sagte mir auch, dass es wohl schon öfter vorgekommen ist, dass ähm  
252 Eltern gesagt haben, dass das wohl problematisch für die Kinder teilweise ist, ähm  
253 was ich auch verstehen kann. Ich glaube, wir haben das auch, dass (.), wenn wir  
254 Sachen machen müssen, ähm und immer wieder das gleiche hören, dass wir  
255 irgendwann sagen: „Sag mal, hast du eigentlich den Kaffee auf?! Ich hab's  
256 verstanden.“ Ne? Also die Kinder sind ja nicht dumm. Die sind zwar jünger als wir,  
257 aber die sind ja nicht auf den Kopf gefallen. Wenn man denen das erklärt einmal  
258 und vielleicht noch ein zweites Mal, haben die verstanden, was man machen muss.  
259 Dann muss man denen das nicht noch ein drittes, viertes und nen VIERZIGSTES  
260 Mal durcheiern. Weil die Kinder trainieren, ja, ich glaube, 40 Tage. 40  
261 Trainingseinheiten machen die das. Deshalb kann man nicht davon ausgehen, dass  
262 diese eine Aufgabe jedes Training drankommt, ob die bestimmt jedes äh zweite,  
263 dritte oder vierte Training vor. Das heißt, die kriegen diese ähm ähm Einheiten, diese  
264 Erklärungen ja für jede Aufgabe mindestens zehnmal oder fünfzehnmal  
265 vorgequatscht. Ja also da denke ich mir auch so: „ja, NE!“ Ähm ansonsten spezifisch  
266 bei DEN Apps mmh (überlegend). Ich habe jetzt nicht großartig viel mit denen  
267 gespielt und als ich das gemacht habe, war das halt auch vor der ersten Welle, was  
268 ja schon ein BISSCHEN her ist. Ähm aber grundsätzlich ähm das Konzept der Apps  
269 ist gut. Es basiert ja auch alles irgendwie. Man spielt das ja auch zusammen mit  
270 dem Cody-Test. Ähm also die App in sich ist schlüssig und ähm in sich hat die auch  
271 mehr Chancen und mehr Möglichkeiten, als sie meiner Meinung nach Probleme (..)   
272 verursacht. Bis halt auf diese Sache, dass man halt die Erklärungen nicht  
273 überspringen kann, ja. ##22:14##

274 A: **Ja, mmmh, Okay. Okay, gut, dann kommen wir doch jetzt zu den Chancen**  
275 **dieser Apps. Wo siehst du denn die Vorteile bei diesen beiden Trainingsapps**  
276 **Meister Cody (.) Namagi und Talasia? ##22:28##**

277 I2: Ähm gut, das ist jetzt wahrscheinlich erstmal wieder allgemein, aber grundsätzlich  
278 sehe ich halt für die ähm Generation, die jetzt halt groß wird. Die werden halt mit  
279 Tablets und digitalen Medien groß. Ähm dementsprechend ist generell dieses  
280 Online-Lernen hat natürlich im Generellen hat seine ähm positiven als auch negative  
281 Seiten, ne? Dann gibt es die einen, die das sagen, die anderen, die das sagen. Aber  
282 grundsätzlich glaube ich schon, dass wir uns halt auch Lernen generell auch  
283 digitaler wird. Von daher glaube ich schon, dass es ähm gut ist auch den Kindern



284 die Möglichkeit zu bieten, solch essentielle ähm Fähigkeiten wie Mathe und ähm  
285 Deutsch halt digital zu lernen. Und vor allem bei Namagi und Talasia sind das ja halt  
286 sehr fundierte Apps, ne? Also es gibt ja besonders für den Cody auch diesen ähm  
287 Test, den der [geschwärzt] ja entwickelt hat. Und ich bin jetzt nicht hundertprozentig  
288 sicher, ob das ganze ähm greift, glaube ich. Also dieser Test greift ja auch in diese  
289 Matheapp, greift das so ein bisschen auf. Ähm und was ich persönlich gut finde, ist  
290 halt ähm, dass die App ja auch so ein bisschen ähm an sich an die Kinder anpassen.  
291 Ich bin mir da nicht hundertprozentig sicher, das müsstest du eventuell nochmal mit  
292 [geschwärzt] und [geschwärzt] klären, abklären, weil die da noch ein bisschen mehr  
293 Ahnung haben. Aber ich glaube, dass die App in sich ähm sich den Fähigkeiten der  
294 Kinder anpasst, also wenn die App am Anfang merkt: Okay, das Kind hat jetzt die  
295 Anfangssection mehr oder weniger, die Anfangsaufgaben ähm gut gelöst, dann  
296 werden die Aufgaben halt nach und nach schwieriger. Wenn die App merkt, dass  
297 das Kind diese Aufgaben gut gelöst bekommt, sodass das Kind halt ähm konstant  
298 nicht über-, aber auch nicht unterfordert ist. Ähm was ich halt super gut finde, weil  
299 normalerweise, wenn du halt so Trainingsspiele hast, dann hast du halt ja Klasse 1,  
300 2, 3, 4. So war das zumindestens damals bei mir. Ne? Du hast halt die  
301 verschiedenen Klassen und dann machst du halt die Spiele für deine Klasse durch,  
302 aber ähm die Software geht halt nicht direkt auf deine Fähigkeiten ein. Und das ist  
303 halt so eine Sache, die ich halt gut finde ähm, weil man so die Kinder konstant ähm  
304 ja FORDERT, aber halt auch nicht überfordert oder unterfordert. Also sodass die  
305 halt in ihren Fähigkeiten Erfolge sehen, aber halt auch nicht denken so: „Ich kann  
306 das jetzt alles! Ich kann das Ding jetzt mehr oder weniger in die Ecke knallen!“ Ne?  
307 Also sodass die halt jetzt auch immer die Motivation, wenn sie halt wirklich lernen  
308 wollen; dass sie halt auch am Ball bleiben. (..) Joa. ###25:06##

309 A: **Mhm (bejahend), okay, ja du hattest schon über App Appbasiertes Lernen**  
310 **gesprochen über die beiden Apps hinaus, aber es gibt ja noch andere Formen**  
311 **digitalen Lernens. Was zählt denn für dich noch unter digitales Lernen?**  
312 **###25:26##**

313 I2: Ähm uff ähm mmhm (überlegend) ähm (.) digitales Lernen (.) es ist halt so ein  
314 riesengroßer weiter Begriff. Im Moment unter Zeiten von Corona ist halt so viel  
315 digitales Lernen, ne? Also jetzt für unser auf unserem Niveau kannst du dich in  
316 variableste Onlinekurse von irgendwelchen Unis einschreiben. Also für mich ist  
317 digitales Lernen (.) Lernen also in jedwelcher Form mit digitalen Medien, sei es jetzt  
318 ein Computer oder oder oder. Ne? Also du kannst auch über dein Handy digitales

319 Lernen betreiben, ne? Ähm, das fängt ja schon an, wenn du mehr oder weniger  
320 meiner Meinung nach ein Buch in die Hand nimmst: Auf dem Kindle ähm auf  
321 Englisch zum Beispiel, weil du versuchst, deine ähm Fremdsprachenkenntnisse zu  
322 erweitern und ähm ich habe zum Beispiel meine App ähm; sobald ich ein Wort nicht  
323 weiß, kann ich darauf tippen. Und es sagt mir dann direkt Dictionary, Bezeichnung  
324 von diesem Wort, aber ähm bleibt halt auf Englisch. So gesehen kriege ich dann  
325 halt nicht direkt die Übersetzung, sondern ich weiß, was das Wort bedeutet und nicht  
326 direkt die Übersetzung davon. Und das ist ja grundsätzlich, auch wenn man jetzt  
327 nicht direkt sagen würde: „Okay, das ist jetzt digitales Lernen.“ Ähm im eigentlichen  
328 Sinne ist das ja auch eine Form von Lernen mit digitalen Medien. Weil wenn ich jetzt  
329 hier sitzen würde mit einem Buch, müsste ich jetzt erst sagen: Okay, das ist das  
330 Wort, müsste ich mein Lesezeichen reinpacken, das Buch zumachen. Dann müsste  
331 ich mein Dictionary aus der Ecke holen und sagen: Okay, jetzt muss ich dieses Wort  
332 suchen. Dann steht das Wort wahrscheinlich, weil es in irgendeiner Form dekliniert  
333 ist, in irgendeiner anderen Zeit oder sonst irgendwas NICHT genau so in dem  
334 Dictionary. Dann muss ich für mich wieder die Translation machen: Okay, es müsste  
335 jetzt im Infinitiv stehen, wenn es ein Verb ist. Dann muss ich dieses Wort dann in  
336 dem Dictionary suchen, wofür ich meistens zu blöd bin und dann steht da halt auch  
337 wieder nur die Übersetzung. Das heißt, ich krieg die Übersetzung, anstatt zu wissen,  
338 was das Wort denn eigentlich IN DEM Kontext bedeutet. Ähm von daher, genau, ist  
339 für mich halt digitales Lernen sehr, sehr weit. Also für mich ist alles, wie du deine  
340 Fähigkeiten erweiterst über digitale Medien, digitales Lernen. Also es kann halt  
341 schon bei solchen kleinen Sachen, wie das, was ich gerade beschrieben habe,  
342 anfangen. Und dann natürlich weitergehen über ähm viele Software, die ja  
343 mittlerweile entwickelt wird, auch für Grundschulkindern ähm. Aber das gab es ja  
344 auch schon zu meiner Zeit, als ich klein war, halt Diktate, die halt irgendwie am  
345 Computer geschrieben werden. Oder Grammatik, die über das Internet geübt wird,  
346 dann gibt es ja mittlerweile ja viele Seiten im Internet, ähm wo man Vokabeln lernen  
347 kann für Englisch, für Deutsch, für alles Mögliche. Dann gibt es ähm ja auch viele  
348 Resources, die du im Internet findest von dort. Von auch hier Grammatikaufgaben  
349 über ähm Foren für, wie rechne diese jene welche Formel in Mathematik? Wie  
350 mache ich das, wofür brauche ich die? Äähm, wir haben ja mittlerweile über das  
351 Internet haben wir einen Überfluss an (.) Dingen, an denen wir lernen können oder  
352 mit denen wir lernen können. Ähm es gibt auch, was ich viel für meine Masterarbeit  
353 genutzt habe: Statistikforen, wo dann halt kleinschrittig erklärt wird, wofür brauche  
354 ich das, warum rechne ich das so, was bedeutet das im Kontext und wie berichte

355 ich das dann in einem Artikel oder in einer meiner Arbeit richtig, ne? Also digitales  
356 Lernen ist halt für mich nicht nur: Ich nehme mir jetzt eine App oder eine Software,  
357 die halt spezifisch für Lernen entwickelt wurde, und ähm mach dann da meine  
358 Aufgaben oder meine halbe Stunde, die ich mir jeden Tag ansetzte, sondern das ist  
359 halt viel, ähm weil wir halt einfach mittlerweile so viel an Wissen im Internet haben  
360 und, ne? Wir erweitern damit ja unser Wissen. Und ich glaube ähm die Kinder, die  
361 jetzt groß werden, auch wenn sie das nicht aktiv so mitkriegen, lernen halt auch viel  
362 übers Internet. Das muss nicht unbedingt gut sein, je nach dem, wo sich diese  
363 Kinder umtun auf welchen Seiten. Was halt dann schlussendlich das Problem  
364 dadurch, dass die halt so viel mit Internet groß werden, haben die, glaube ich, viele  
365 von unseren Vorbehalten nicht und die reflektieren das nicht so. Ähm weil ich weiß,  
366 als wir angefangen haben Internet zu haben, war das halt so eine unermessliche  
367 Weite. Und wir waren unglaublich vorsichtig, wo wir uns umtaten und ob das auch  
368 sicher ist. Und ich glaube, diese Kinder sind halt ähm desensibilisierter, was das  
369 angeht. Für die ist halt das Internet ihr Zuhause Nummer 1. Mehr oder weniger  
370 neben, wo sie tatsächlich wohnen ähm. Und auch so Sachen wie zum Beispiel  
371 Twitter als Negativbeispiel, wo dann eigentlich eine App ist, die im Appstore für ab  
372 18 mehr oder weniger deklariert ist. Wo sich dann halt Kinder, (seufzt) die zwölf 13  
373 und 14 sind, umtun und ähm einen Cyberbullying betreiben und so einen Krempel  
374 und reinforct werden, dass das okay ist, das so zu tun, ähm bringt denen ja eigentlich  
375 eine Norm bei, die eigentlich nicht gut sind. Und was ja auch grundsätzlich eine  
376 Form von Lernen ist, weil die werden ja über solche Foren auch sozialisiert. Es ist  
377 eine komplett andere Form von Lernen, weil es halt nicht über Mathe, Deutsch,  
378 Englisch oder sonst was geht. Aber die lernen halt, was okay ist oder wie es okay  
379 ist, sich in Interaktion mit anderen Menschen zu verhalten ähm und zwar in einer  
380 nicht guten Art. Ich will nicht sagen, dass das alle Kinder tun. Aber zumindestens  
381 ich hab erlebt in dem Teil von Twitter, wo ich mich bewege, dass ähm junge Kinder  
382 so um die dreizehn vierzehn ähm nicht wissen, was sie da von sich geben. Und trotz  
383 dass sie das tun, haben sie noch genug hunderte von Leuten, die sagen: „JA, das,  
384 was du da tust, ist total toll!“ Und ich denke mir nur so: „NEIN“! Und die lernen aber,  
385 dass das okay ist und das ist halt eigentlich überhaupt nicht gut. Ähm also was war  
386 deine Frage vom Anfang? (lacht) Jetzt erzähle ich hier. ##32:02##

387 A: **Es ging darum, was für dich digitales Lernen bedeutet. ##32:05##**

388 I2: JA, ALLES. ##32:07##

389 A: **Genau. ##32:08##**

390 I2: Vieles. (lacht) ##32:09##

391 A: **Okay, genau, okay, du hast ja jetzt schon sehr viel über Vor- und Nachteile**  
392 **geredet. Wurden dir denn auch von den Eltern, ja deren Meinung über digitales**  
393 **Lernen zugetragen oder welche Meinungen haben denn die Eltern so**  
394 **vertreten? ##32:24##**

395 I2: Ähm von den Eltern habe ich jetzt nicht viel gehört. In der ersten Welle ähm habe  
396 ich primär mit den Schulen zusammengearbeitet. Nicht so viel mit den ähm Eltern  
397 an sich. Ähm da habe ich mit einer Lehrerin da ähm ein längeres Gespräch drüber  
398 geführt, die eigentlich von diesem digitalen Lernen nicht so angetan ist. Weil sie halt  
399 immer noch sagt, es ist viel besser, wenn die Kinder halt auch wirklich lernen, einen  
400 Stift in die Hand zu nehmen und das auch zu schreiben. Und ich glaube da in einer  
401 gewissen Weise gebe ich ihr Recht. Ich glaube auch, dass es auch unglaublich hilft  
402 EINIGEN Kindern. Ich glaube nicht, dass man alle Kinder immer in eine Schublade  
403 stecken kann: Das funktioniert nicht, weil wir alle anders sind. Dass es einigen  
404 Kindern tatsächlich hilft, den Stift in die Hand zu nehmen. Und wenn es darum geht,  
405 zum Beispiel ein Gedicht auswendig zu lernen, ähm das Gedicht wirklich nochmal  
406 abzuschreiben oder Vokabeln wirklich nochmal abzuschreiben, anstatt die halt  
407 stumpf auswendig zu lernen. Es gibt bestimmt Kinder, die machen das gerne und  
408 für die ist das okay. Aber, ich glaube, es gibt auch genauso Kinder, die das halt  
409 tatsächlich brauchen, einen Stift oder einen Füller in die Hand zu nehmen und die  
410 einfach einmal stumpf abzuschreiben, weil es sich dann einfach besser hier setzt.  
411 Ähm von daher ähm ja, wie gesagt, diese Lehrerin war halt grundsätzlich nicht so  
412 angetan, fand dieses Projekt an sich aber super interessant und hat deswegen  
413 gesagt, sie macht das mit. Ähm und ich glaube ähm die Lehrer an sich in den  
414 Schulen haben dazu auch eine viel stärkere Meinung als die Eltern, weil die Eltern,  
415 glaube ich, sind halten sich da zumindestens gegenüber mir mit ihrer Meinung sehr  
416 zurück. Teilweise bekommt man dann halt so in den ähm Gesprächen, wenn es  
417 dann hinterher zu den Testungen geht oder auch bei den Testungen selber, so eine  
418 Rückmeldung wie: „Ja, meiner Tochter hat das super viel Spaß gemacht“. Ähm das  
419 sind so die einzigen Rückmeldungen, die man halt tatsächlich von den Eltern kriegt.  
420 Ich glaube von den Lehrern, mit denen wir zusammen gearbeitet haben in der ersten  
421 Welle, hätte man, wenn man da, wenn man da nachgefragt hätte ähm stärkere  
422 Meinungen gekriegt zu, wie stehen sie jetzt zu digitalem Lernen. Ich glaube, die  
423 Eltern, ich will jetzt auch nicht sagen alle Eltern, aber ähm einige von den Eltern, mit  
424 denen wir zusammenarbeiten, sind, glaube ich, nicht so da investiert, wie ihre Kinder

425 lernen. Ähm und ich glaube von daher ist denen erstmal egal, wie ihre Kinder lernen  
426 und ich glaube, die machen sich da auch keine großen Gedanken zu, ob das jetzt  
427 vorteilhaft ist, dass ihre Tochter oder ihr Sohn da jetzt auf einem Tablet rumtippen.  
428 Oder ob sie jetzt ihre Vokabeln abschreibt oder nicht ähm einfach, weil die halt  
429 generell nicht so investiert sind, dass gelernt wird. Und dann halt auch, wie gelernt  
430 wird. Eltern, die da eher hinter sind, bei denen könnte ich mir eher vorstellen, dass  
431 sie da grundsätzlich eine Meinung zu haben, ähm ob digitales Lernen jetzt sinnvoll  
432 ist oder nicht. Aber ich glaube auch dahingehend, dass die Eltern, die wir  
433 schlussendlich im Projekt haben, eher die sind, die PRO digitales Lernen sind als  
434 die, die dem ganzen eher negativ gegenüberstehen. Weil es ähm stand ja von  
435 vornherein fest, dass wir mit einer App arbeiten. Und ich glaube, wenn die sehr  
436 gegen ähm Lernen mit Apps wären, ähm würden die halt von vornerein sagen: „Ja,  
437 mein Kind kann an der ähm entweder direkt an dem Screening nicht teilnehmen“.  
438 Ähm weil da müssen sie ja nicht explizit sagen, warum nicht, sondern das ist ja dann  
439 einfach nein. Ähm genau. Also ich glaube, das sind halt dann die Eltern halt, die sind  
440 so: „Ne, brauchen wir nicht, danke!“ Ähm und dass wir eher in der Studie die haben,  
441 die positiv gestimmt sind, wie gesagt. Auf der Seite der Lehrer könnte das ein  
442 bisschen anders ausgesehen haben letztes Jahr. Wie gesagt, diese Lehrerin, mit  
443 der ich gesprochen hatte, war ja auch so ein bisschen mmh-mmmh-mmh  
444 (abwägend). Und hat trotzdem an der Studie teilgenommen, einfach weil sie sagte,  
445 es kann Vorteile haben, es kann Nachteile haben. Ähm und sie fand das Projekt in  
446 sich interessant und wollte uns halt auch unterstützen, ähm weshalb sie dann halt  
447 teilgenommen hatte. Und ähm ich glaube, solche Meinungen würde man bei den  
448 Lehrern viel viel stärker kriegen. Einfach weil die sich halt wie Kinder lernen und was  
449 halt, ne?, gute Lernstrategien sind. Damit setzten die sich halt viel eher auseinander  
450 als Eltern. Genau. ##36:51##

451 A: **Mhm (zustimmend). Ja, das stimmt. Gut, dann sind wir auch schon am Ende**  
452 **angekommen. Was heißt auch schon? Genau. ##37:00##**

453 I2: Ich hab ganz viel gequasselt. Die Hälfte davon kann man bestimmt nicht  
454 gebrauchen. ##37:04##

455 A: **Ach, doch. Ich glaube, da kommt mir sehr viel Wichtiges, können wir daraus**  
456 **ziehen. Genau, eine Frage habe ich noch. Wenn du dir jetzt nochmal das**  
457 **Gespräch rückblickend betrachtest, gibt es noch irgendwas Wichtiges, was**  
458 **wir jetzt noch nicht gesagt haben, was du gern noch ansprechen würdest?**  
459 **Kann man sonst. ##37:27##**

460 I2: Ähm zum einen, wo ich jetzt nicht so hundertprozentig drauf eingegangen sind, sind  
461 halt die Eltern, (.) die, ich weiß nicht, technik-illiterate sind. Ähm also die überhaupt  
462 nichts mit Technik anfangen können. Ähm und dementsprechend das hatten wir  
463 auch schon IN KOMBINATION MIT Sprachbarriere. Das sind halt so Sachen, da  
464 wird es dann halt brenzlich. Also Ich hatte halt eine Mutter, mit der ich gesprochen  
465 hatte, die (.) war (..) konnte nicht gut Deutsch, ich mach keine, keine Vermutung, wo  
466 sie herkommt, die konnte jedenfalls NICHT GUT DEUTSCH. Sie hatte auch, ich  
467 glaube, drei Kinder. Also das Kind, was bei uns in der Studie und noch zwei kleinere.  
468 Ähm und sie konnte gar nicht mit Technik, SO! Ähm dementsprechend ihr klar zu  
469 machen, wie sie das ähm einzurichten hat, wenn sie mich schon kaum verstehen  
470 kann, ist halt, ne? So eine Doppelbarriere, wo ich dann so, ne? Ähhche (genervte  
471 verzweifelte Laute). Ne? Weil ich kann nicht plötzlich eine andere Sprache lernen  
472 und sie kann nicht plötzlich meine Sprache können. Das funktioniert nicht und selbst,  
473 wenn man die gleiche Sprache spricht, ist es halt teilweise schwierig, Eltern, die  
474 nicht gut mit Technik sind, zu erklären, sie MÜSSEN in dem Appstore NUR die App  
475 runterladen und dann die Schritte nach dieser Liste (unv.) ##38:58## Ja, also auch  
476 da gab es Eltern, die sind so: (..) „Technik! Hilfe!“ (Ausrufungen mit verstellter hohe  
477 Stimme) Ähm aber, wie gesagt, ich glaube, in diesem ganzen Trainingsablauf den  
478 Eltern auch klar zu machen: „Okay, Ihre Kinder müssen trainieren, und zwar so und  
479 so oft in der Woche, weil wir jetzt an diesem Projekt teilnehmen. Und das ist jetzt  
480 Teil des Projektes.“ Wenn die halt diese Sprachbarriere da irgendwo noch  
481 zwischenhängt, ist halt teilweise nicht einfach. Ähm ich habe dann immer gehofft,  
482 dass sie verstanden haben, was ich gesagt habe. Hab aber nochmal nachgefragt,  
483 ob sie das verstanden haben. Aber auch da ist, halt alle mal so die Sache, ne? Die  
484 können sagen; „Ja, ja, habe ich verstanden! Ist okay.“ Aber ob das dann halt  
485 tatsächlich auch wirklich so ist, ist dann halt eine andere Frage. Ähm und ähm auch  
486 da könntest du [geschwärzt] vielleicht mal fragen oder [geschwärzt] ähm. Das Ganze  
487 könnte halt natürlich auch noch weiterhin zu einem ähm verheerenderen Nachteil  
488 von Apps generell führen. Auch für die Namagi und Talasia-App, wenn die Kinder  
489 (.) ähm auch viel mit ihren Eltern zuhause, die jeweils andere Muttersprache  
490 sprechen und halt nicht SO gut deutsch sprechen können. Wenn die Apps nicht  
491 sprachfrei sind, was sie ja (lachend) nur allein schon über die Erklärungen, die sind  
492 ja nicht hundertprozentig sprachfrei. Also man müsste zumindest schon ja schon  
493 mal die Erklärungen müssen ja verstanden werden, damit das Kind weiß, was es da  
494 tun muss. Also Sprachbarriere ähm ist halt auch so eine Sache, die ähm  
495 problematisch sein kann. Nicht nur in dem Anlaufen des Trainings und mit den Eltern

Appbasierte Förderansätze für Kinder mit Lernstörungen –  
Chancen und Herausforderungen aus der Angehörigenperspektive

Transkript des Interviews mit „Projektbegleiterin 2“ bzw. I2

496 zu sprechen, sondern auch bei den Kindern, wenn sie mit der App schlussendlich  
497 trainieren. Genau. ##40:48##

498 A: **Stimmt, das ist ein guter Punkt, den ich auch an meinen Telefoninterviews**  
499 **(lacht) festgestellt hab, ja. ##40:54##**

500 I2: Ja, auch da wirst du teilweise dieselben Eltern da an der Strippe gehabt haben, die  
501 ich auch mal so – okay. ##41:01##

502 A: **Genau, ja, okay, ja dann: Dankeschön für das Gespräch. Ich beende**  
503 **mal...##41:07##**
